# Supplementary material for: Development in competitive immunoassay of a point-of-care testing for cotinine (COT) detection in urine
Source: Royal Society of Chemistry journal article supplement (doi:10.1039/d4ay00518j), 2024-01-01
Supplement: d4ay00518j1.pdf [file d4ay00518j1.pdf]

## Supplementary information

### Characterizations

The immobilization of mAb-COT onto the AuNP was monitored using a UV-vis spectrophotometer. The maximum absorption wavelength of the AuNP was 523 nm, while the wavelength of the mAb-COT-AuNP was slightly shifted to 526 nm (Figure 1S). The minor shift was caused by a change in the refractive index, which caused the layer mAb-COT that was conjugated onto the AuNP.

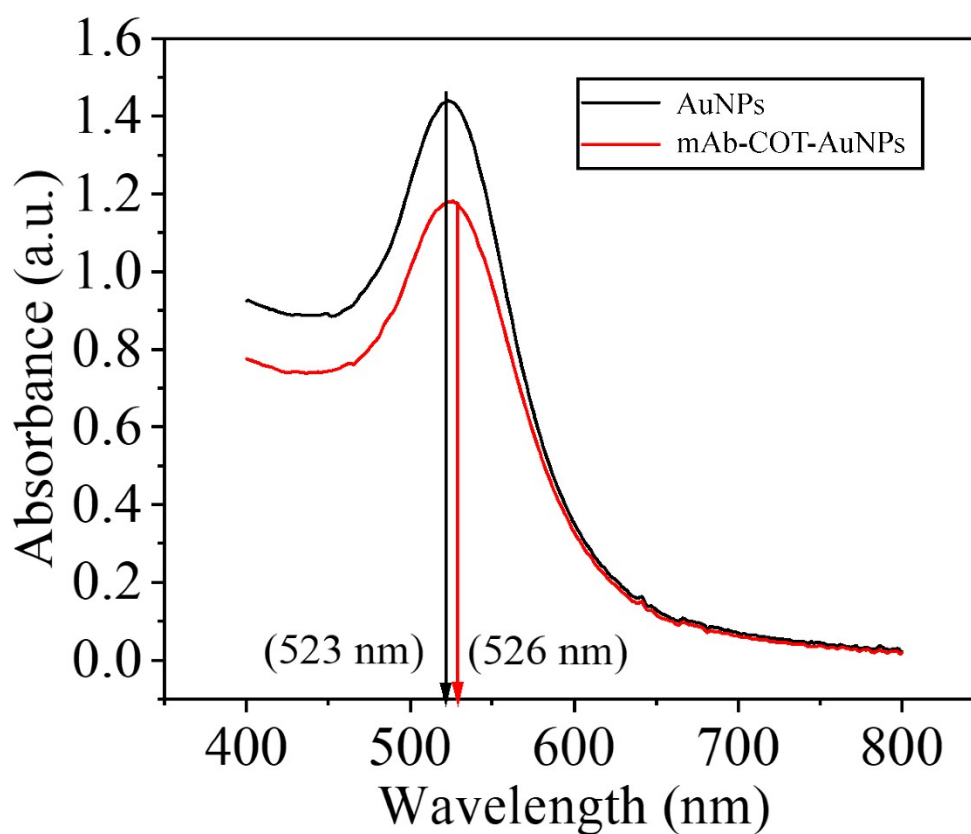

Figure 1S. Absorption spectra of AuNP (black line) and mAb-COT-AuNPs (red line).

Table S1. Comparison of cotinine screening results in pooled urine samples using the ELISA assay and the developed LFIA.

| Spiked cotinine<br>(ng/mL) | Found            |          |
|----------------------------|------------------|----------|
|                            | ELISA<br>(ng/mL) | LFIA     |
| 0                          | 3.1              | Negative |
| 25                         | 29.5             | Negative |
| 50                         | 68.9             | Positive |
| 100                        | 81.7             | Positive |
| 150                        | 155.1            | Positive |

|      |       |          |
|------|-------|----------|
| 200  | 216.2 | Positive |
| 300  | 357.4 | Positive |
| 500  | 423.6 | Positive |
| 1000 | 900.0 | Positive |
